# Supplementary material for: Structure of type II collagen from sturgeon cartilage and its effect on adjuvant-induced rheumatoid arthritis in rats
Source: Royal Society of Chemistry journal article supplement (doi:10.1039/d1fo03929f), 2022-01-01
Supplement: d1fo03929f1.pdf [file d1fo03929f1.pdf]

1 **Structure of type II collagen from sturgeon cartilage and its**  
2 **effect on adjuvant-induced rheumatoid arthritis in rats**

3 Zhaoxia Li<sup>a,b</sup>, Xue Bai<sup>a</sup>, Yan Fan<sup>a</sup>, Qiannan Jia<sup>a</sup>, Hongwei Zhang<sup>c</sup>, Hu

4 Hou<sup>\*a,b</sup>

5

6 Author affiliation(s):

7 <sup>a</sup> College of Food Science and Engineering, Ocean University of China, No.5,

8 YuShan Road, Qingdao, Shandong Province, 266003, P.R. China

9 <sup>b</sup> Laboratory for Marine Drugs and Bioproducts, Qingdao National Laboratory for

10 Marine Science and Technology, Qingdao, Shandong Province, 266071, P.R. China

11 <sup>c</sup> Technology Center of Qingdao Customs, No. 83, Xinyue Road, Qingdao, Shandong

12 Province 266109, P.R. China

13

14

15 \*Corresponding author: Hu Hou

16 E-mail: houhu@ouc.edu.cn

17 Phone: +86-532-82031936

18 Fax: +86-532-82031936

19 **Table S1** Specific primer sequences

| Gene          | Forward Primer (3'-5')   | Reverse Primer (3'-5')   |
|---------------|--------------------------|--------------------------|
| GAPDH         | GAAGGTGAAGGTCGGAGTC      | GAAGATGGTGATGGGATTTTC    |
| TNF- $\alpha$ | ACCAGCTAAGAGGGAGAGAAGCAA | TCAGTGCTCATGGTGTCTTTCCA  |
| IL-1 $\beta$  | TTGTGGCTGTGGAGAAGCTG     | GCCGTCTTTCATACACAGG      |
| IL-6          | AAGCCAGAGCTGTGCAGATGAGTA | TTCGTCAGCAGGCTGGCATTGT   |
| RF            | TTTCAATGAGCAAGTGGACAAG   | CAAACCTGAACTGTGGGTAAGTG  |
| APF           | TTGAAAACAGGCCTAAATACGC   | GTTTGTTATGCTCTGAGTCAGC   |
| AKA           | TGTCGGTGCTCAGGTATCCATCC  | TTCGCAAGAGGAAGAGCAGTTCAC |
| MMP-3         | TGGACCAGGGACCAATGGA      | GGCCAAGTTCATGAGCAGCA     |
| MCP-1         | CACTCACCTGCTGCTACTCAT    | CTACAGCTTCTTTGGGACACCT   |
| TLR4          | CACAGACTTGCGGGTTCTACATC  | AGTTCATAGGGTTCAGGGACAGG  |
| MYD88         | AAGGAATGTGACTTCCAGACCA   | GGAATTCAGTCGCTTCTGTTGGA  |
| COX2          | TTCCATTGACCAGAGCAGGCAGAT | GCATCGATGTCACCATAGAGTGCT |
| NF $\kappa$ B | CTGAGAACTGCTCGTGGTGT     | GTTCCCATCAATACGCGTGC     |
